# Supplementary material for: Assessing evapotranspiration dynamics across central Europe in the context of land–atmosphere drivers
Source: Copernicus journal article supplement (doi:10.5194/bg-22-3721-2025), 2025-07-31
Supplement: Supplementary file 1 [file bg-22-3721-2025-supplement.pdf]

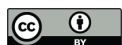

*Supplement of*

**Assessing evapotranspiration dynamics across central Europe in the context of land–atmosphere drivers**

**Anke Fluhrer et al.**

*Correspondence to:* Anke Fluhrer (anke.fluhrer@dlr.de)

The copyright of individual parts of the supplement might differ from the article licence.

Supplement

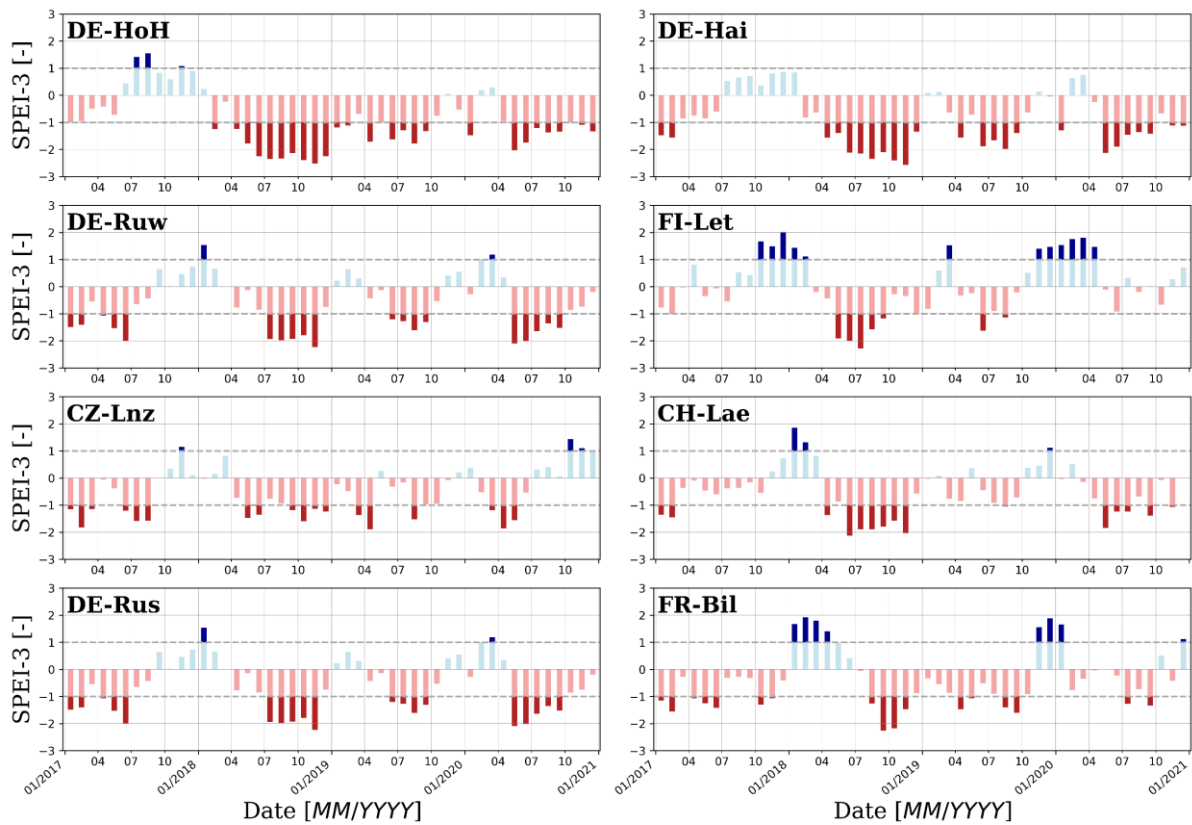

Figure S1. The 3-monthly standardized precipitation-evapotranspiration index, SPEI [-], (Beguería et al., 2023) for the period 2017-2020 at investigated ICOS stations. The vertical dashed lines give the thresholds at -1 and 1 for indicating too dry or too wet months, respectively.

5 Table S1. Coordinates, ecosystem type, altitude, climate zone and meteorological information for every investigated ICOS station.

| ICOS Station | Coordinates<br>(Latitude,<br>Longitude) | Ecosystem type                    | Altitude<br>[m] | Climate Zone<br>(Köppen-<br>Geiger) | Mean annual<br>precipitation /<br>air temperature |
|--------------|-----------------------------------------|-----------------------------------|-----------------|-------------------------------------|---------------------------------------------------|
| DE-HoH       | 52.08656,<br>11.22235                   | deciduous broad-<br>leaved (DBF)  | 217             | Cfb                                 | 1.26 [mm/day] /<br>10.36 [°C]                     |
| DE-Ruw       | 50.50493,<br>6.3309627                  | evergreen needle-<br>leaved (ENF) | 610             | Cfb                                 | 2.89 [mm/day] /<br>8.98 [°C]                      |
| CZ-Lnz       | 48.68155,<br>16.946331                  | mixed forest (MF)                 | 182             | Dfb                                 | 1.42 [mm/day] /<br>11.44 [°C]                     |
| DE-Rus       | 50.865906,<br>6.4471445                 | agriculture                       | 106             | Cfb                                 | 1.45 [mm/day] /<br>11.59 [°C]                     |
| DE-Hai       | 51.079212,<br>10.452168                 | deciduous broad-<br>leaved (DBF)  | 438             | Cfb                                 | 1.87 [mm/day] /<br>9.55 [°C]                      |
| FI-Let       | 60.64183,<br>23.95952                   | evergreen needle-<br>leaved (ENF) | 125             | Dfb                                 | 1.74 [mm/day] /<br>5.67 [°C]                      |
| CH-Lae       | 47.478333,<br>8.364389                  | mixed forest (MF)                 | 682             | Dfb                                 | 2.33 [mm/day] /<br>10.33 [°C]                     |
| FR-Bil       | 44.493652, -<br>0.956092                | agriculture                       | 39              | Cfb                                 | 3.04 [mm/day] /<br>14.1 [°C]                      |

Table S2. Percentages per landcover classes according to the Corine Land Cover (CLC) 2018 (European Environment Agency, 2019) within the 3 km x 3 km footprint around every investigated ICOS station (see Fig. 2).

| Corine Land Cover (CLC)<br>classes 2018 [%]                         | ICOS STATIONS |             |             |             |             |             |             |             |
|---------------------------------------------------------------------|---------------|-------------|-------------|-------------|-------------|-------------|-------------|-------------|
|                                                                     | DE-<br>HoH    | DE-<br>Hai  | DE-<br>Ruw  | FI-<br>Let  | CZ-<br>Lnz  | CH-<br>Lae  | DE-<br>Rus  | FR-<br>Bil  |
| Urban                                                               | 2.2           |             |             |             | 0.7         | 13.3        | 17.2        |             |
| Industrial or commercial units                                      |               |             |             |             |             |             | 5.1         |             |
| Mineral extraction sites                                            |               |             |             |             |             |             | 4.4         |             |
| Non-irrigated arable land                                           | <b>45.6</b>   | 3.3         |             |             | 3.2         | <b>32.2</b> | <b>63.1</b> | 14.2        |
| Pastures                                                            |               | 11.0        | 4.5         |             | 3.9         |             | 6.7         |             |
| Complex cultivation patterns                                        |               |             |             |             |             | 4.3         |             |             |
| Land occupied by agriculture<br>with areas of natural<br>vegetation |               |             |             |             | 6.7         | 7.7         |             |             |
| Broad-leaved forest                                                 | <b>45.5</b>   | <b>82.4</b> | 3.2         |             | <b>56.5</b> | 10.2        | 2           |             |
| Coniferous forest                                                   | 2.7           |             | <b>86.7</b> | <b>51.1</b> |             |             |             | <b>41.4</b> |
| Mixed forest                                                        | 2.6           |             | 3.3         | 36.7        |             | <b>30.3</b> | 1.3         |             |
| Natural grasslands                                                  |               | 3.2         |             |             |             |             |             |             |
| Transitional woodland-shrub                                         |               |             |             | 7.9         | 27.6        |             |             | <b>44.4</b> |
| Water bodies                                                        |               |             |             | 3.9         |             |             |             |             |
| Others                                                              | 1.4           | 0.8         | 2.3         | 0.4         | 1.4         | 2.1         | 0.2         |             |

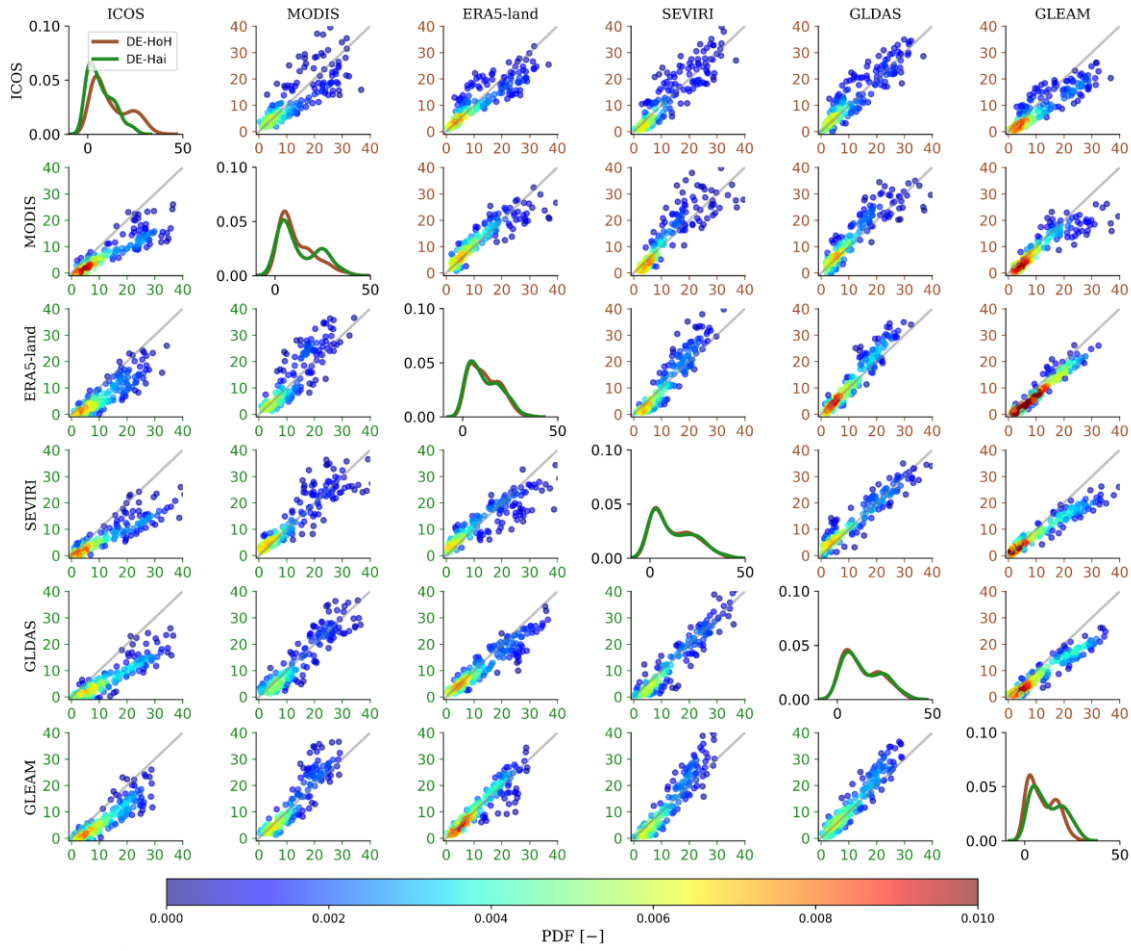

Figure S2. Comparison of seasonal dynamics of ET [mm/8-days] products for the period 2017-2020 at investigated ICOS stations DE-HoH (right panels above the diagonal of the matrix) and DE-Hai (left panels below the diagonal of the matrix). All time series were averaged to 8-daily sums at MODIS dates, and cleaned for daily and weekly dynamics using a Savitzky-Golay filter with a window size of 31 days.

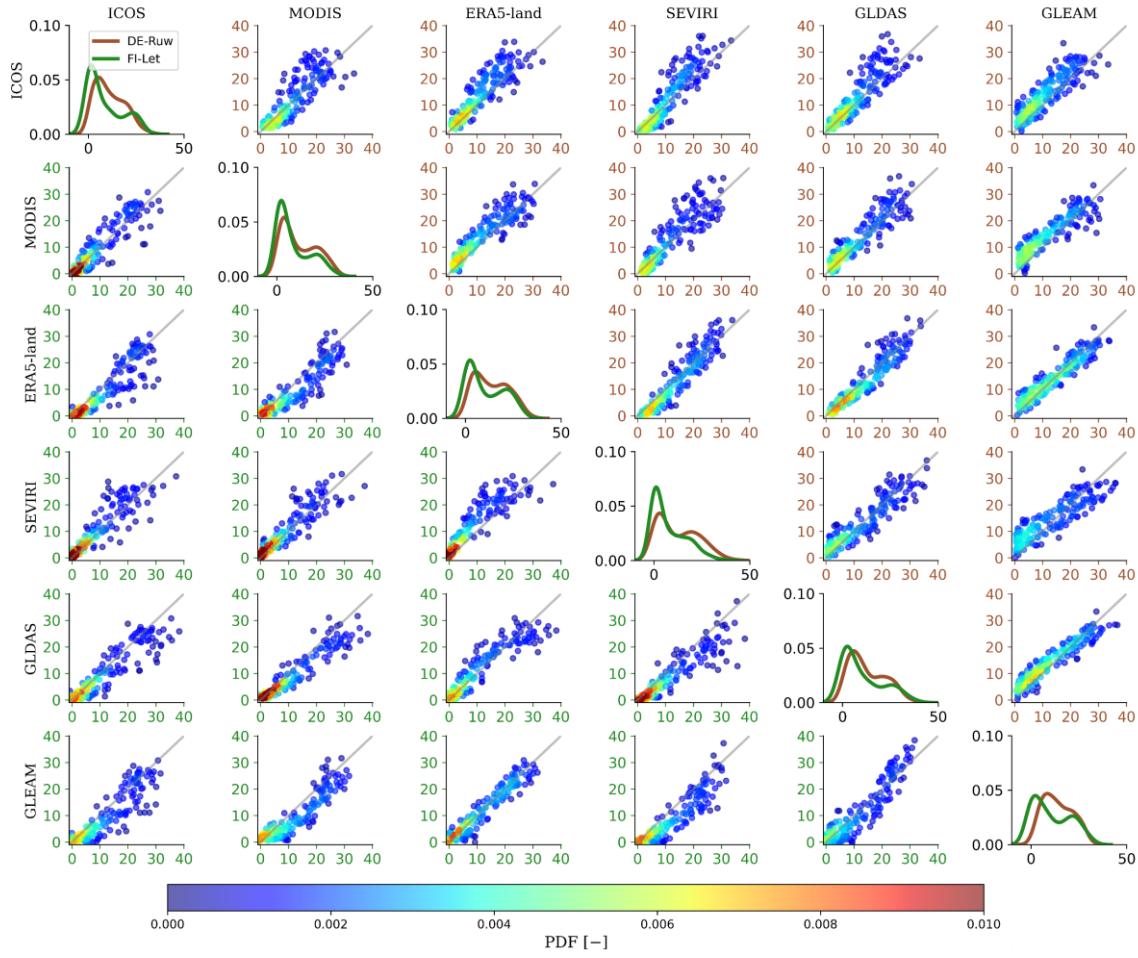

Figure S3. Same as figure S2 but for ICOS stations DE-Ruw (right panels above the diagonal of the matrix) and FI-Let (left panels below the diagonal of the matrix).

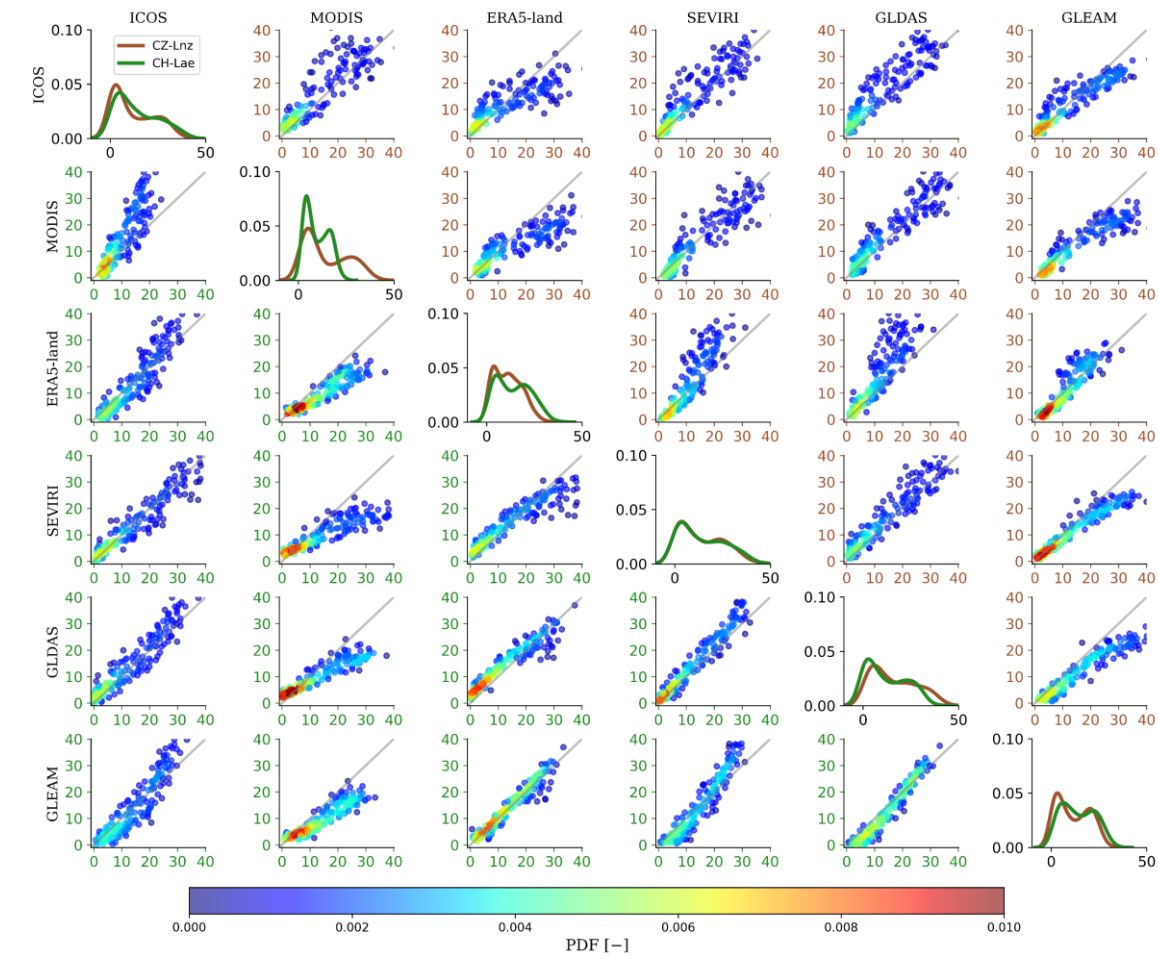

25 Figure S4. Same as figure S2 but for ICOS stations CZ-Lnz (right panels above the diagonal of the matrix) and CH-Lae (left panels below the diagonal of the matrix).

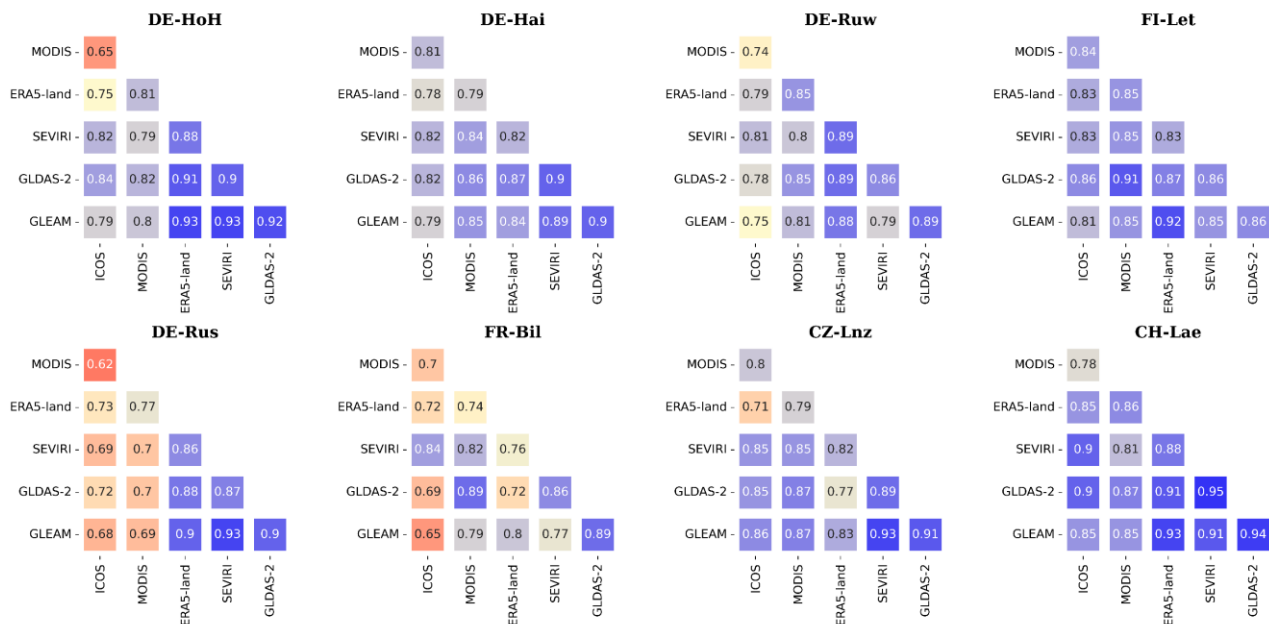

Figure S5. Pearson's coefficient of determination ( $R^2$ ) among all ET [mm/8-days] products for the period 2017-2020 at investigated ICOS stations. All time series were averaged to 8-daily sums at MODIS dates, and cleaned for daily and weekly dynamics using a Savitzky-Golay filter with a window size of 31 days. The color ranges from low correlations (red) to high correlations (blue).



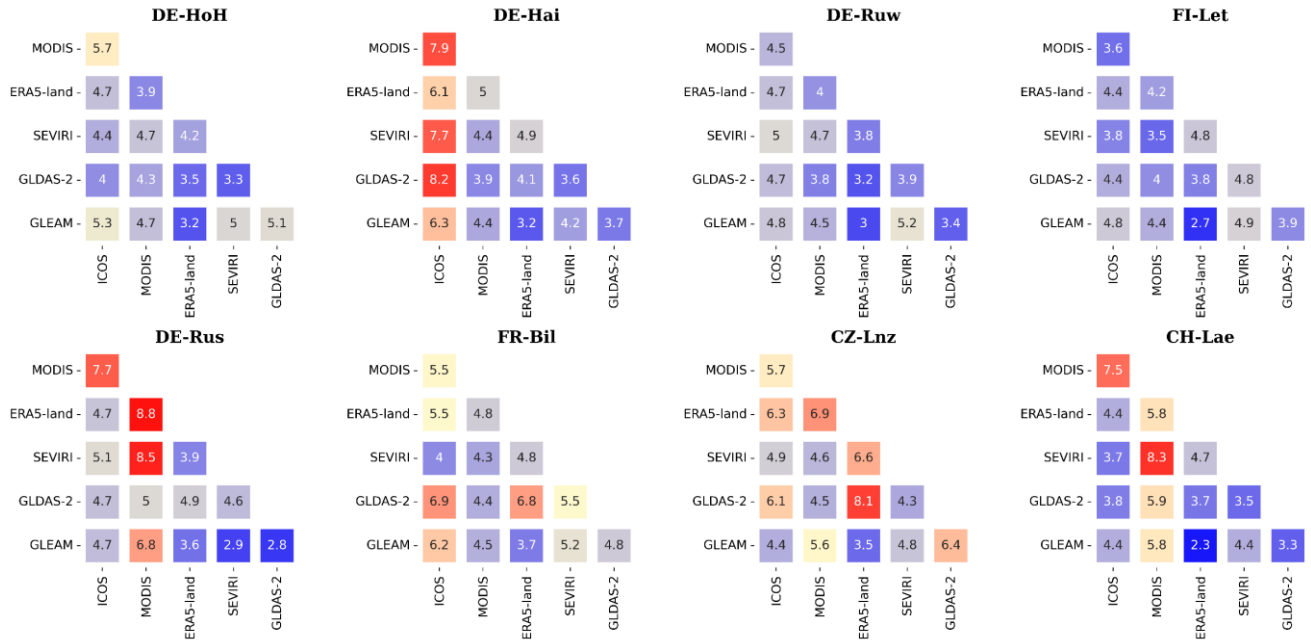

Figure S6. Root-mean square error (RMSE) [mm/8-days] between all ET [mm/8-days] products for the period 2017-2020 at investigated ICOS stations. All time series were averaged to 8-daily sums at MODIS dates, and cleaned for daily and weekly dynamics using a Savitzky-Golay filter with a window size of 31 days. The color ranges from low RMSE (blue) to high RMSE (red).

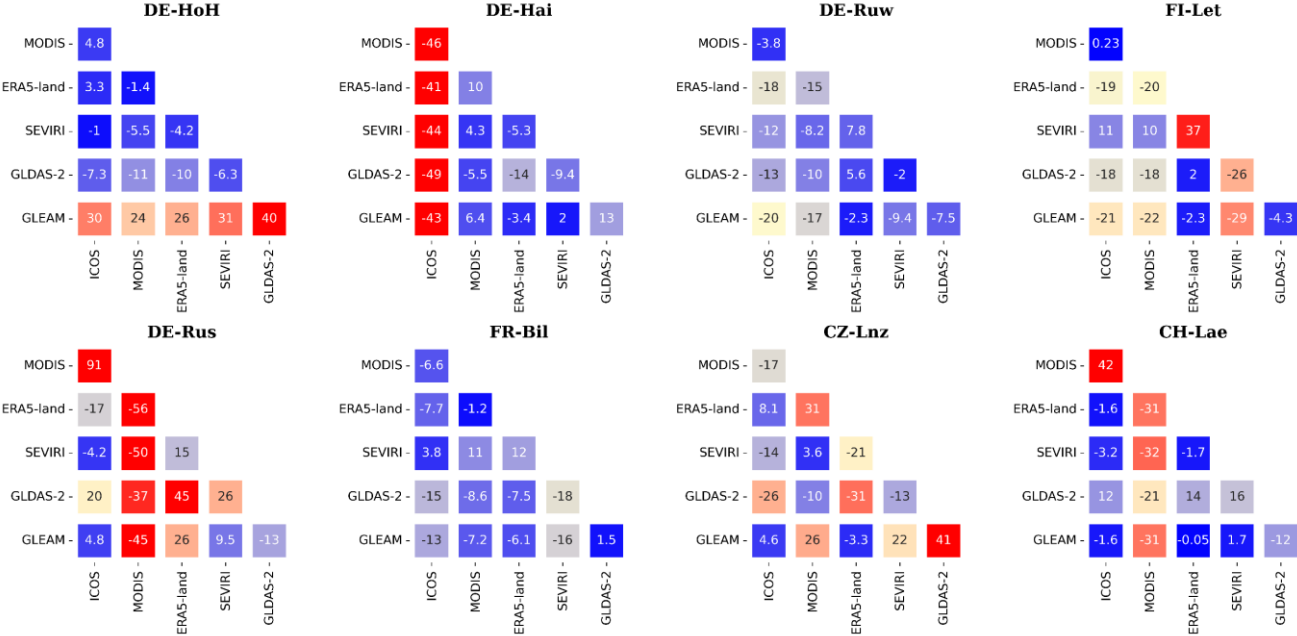

Figure S7. Percentage bias (PBIAS) [%] between all ET [mm/8-days] products for the period 2017-2020 at investigated ICOS stations. All time series were averaged to 8-daily sums at MODIS dates, and cleaned for daily and weekly dynamics using a Savitzky-Golay filter with a window size of 31 days. The color ranges from low PBIAS (blue) to high PBIAS (red).

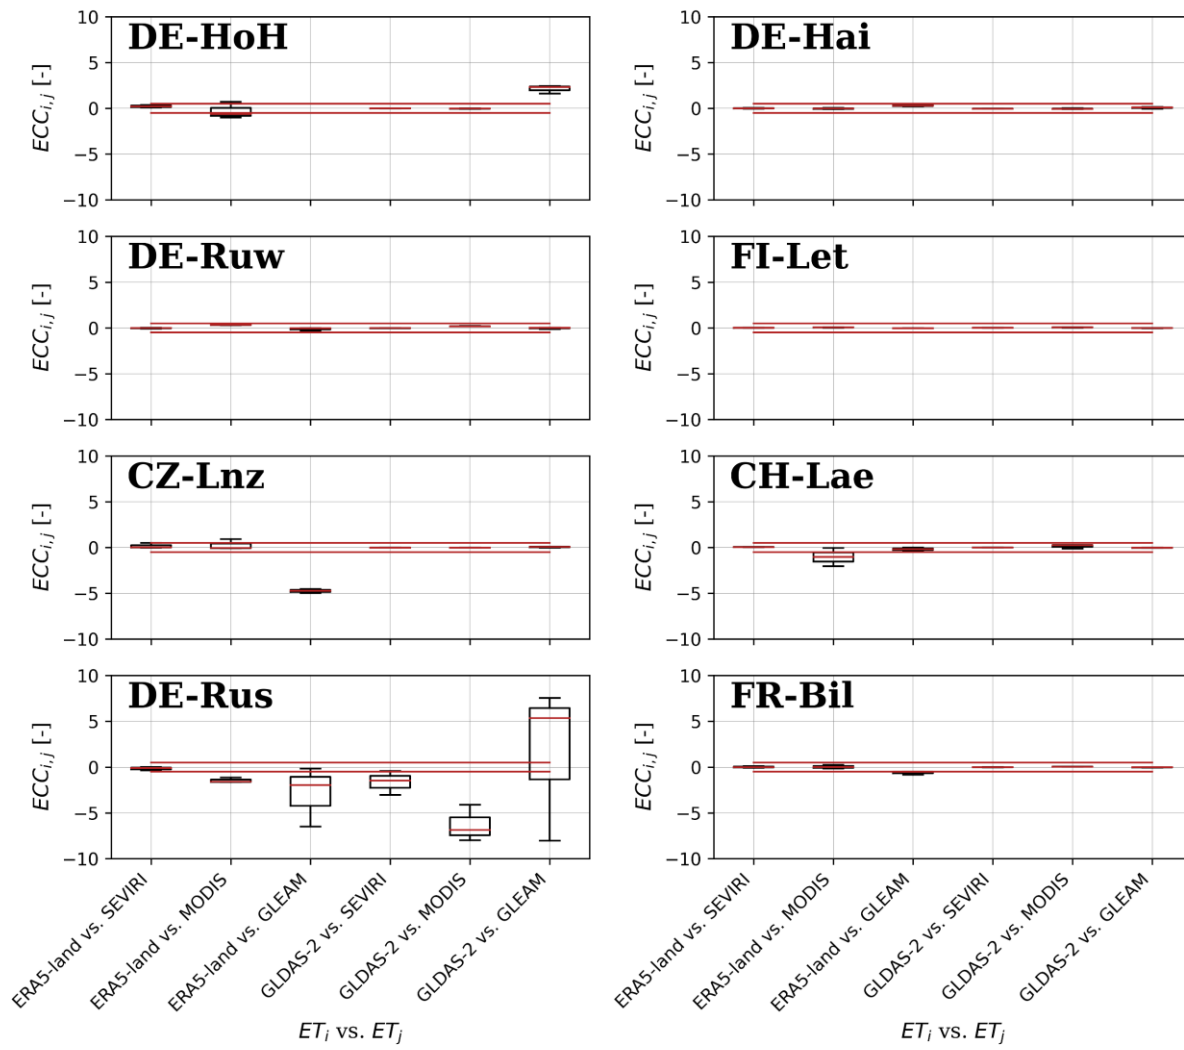

55

Figure S8. Error cross-correlation (ECC) results between ET products at investigated ICOS stations. The area between the horizontal red lines at -0.5 and 0.5 indicate the range of acceptable ECC (see Sec. 2.3.1).

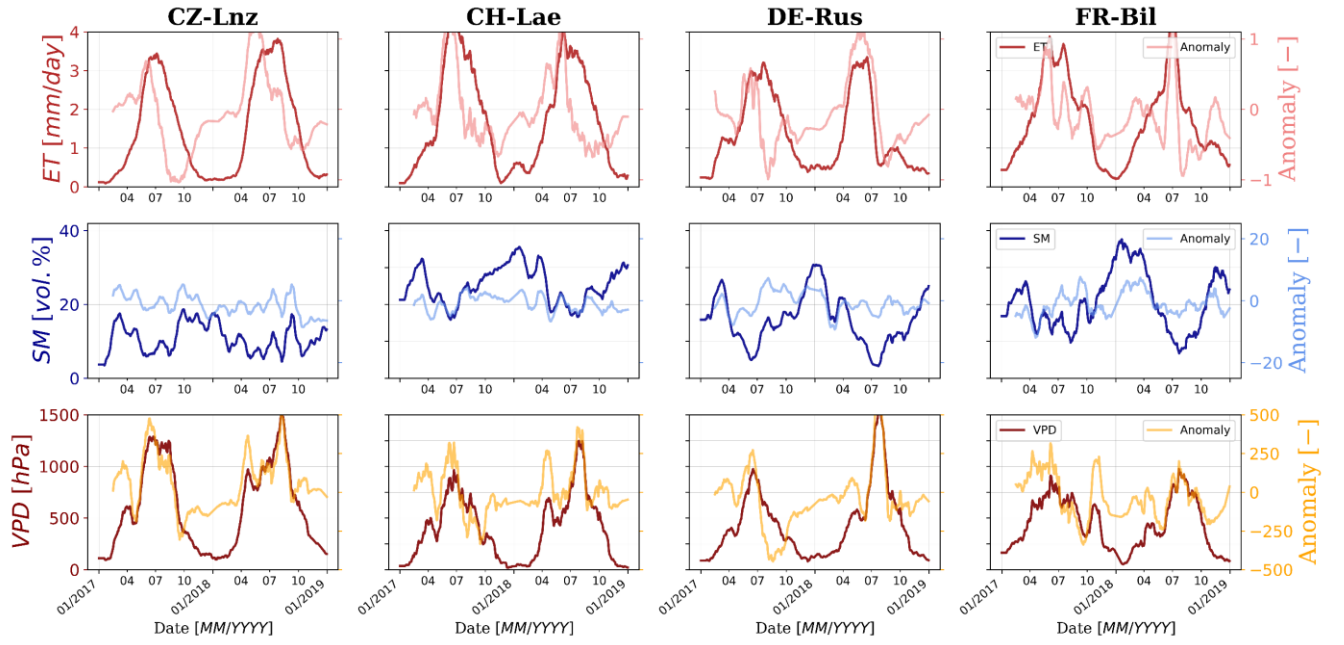

Figure S9. Time series of daily ICOS ET [mm/day], SMAP SM [vol.%], and in-situ VPD [hPa] for 2017 and 2018 at mixed forest (CZ-Lnz, CH-Lae), and agriculture (DE-Rus, FR-Bil) stations compared to their respective anomalies, calculated as described in sec. 2.3.2. All time series were cleaned for daily and weekly dynamics using a Savitzky-Golay filter with a window size of 31 days.

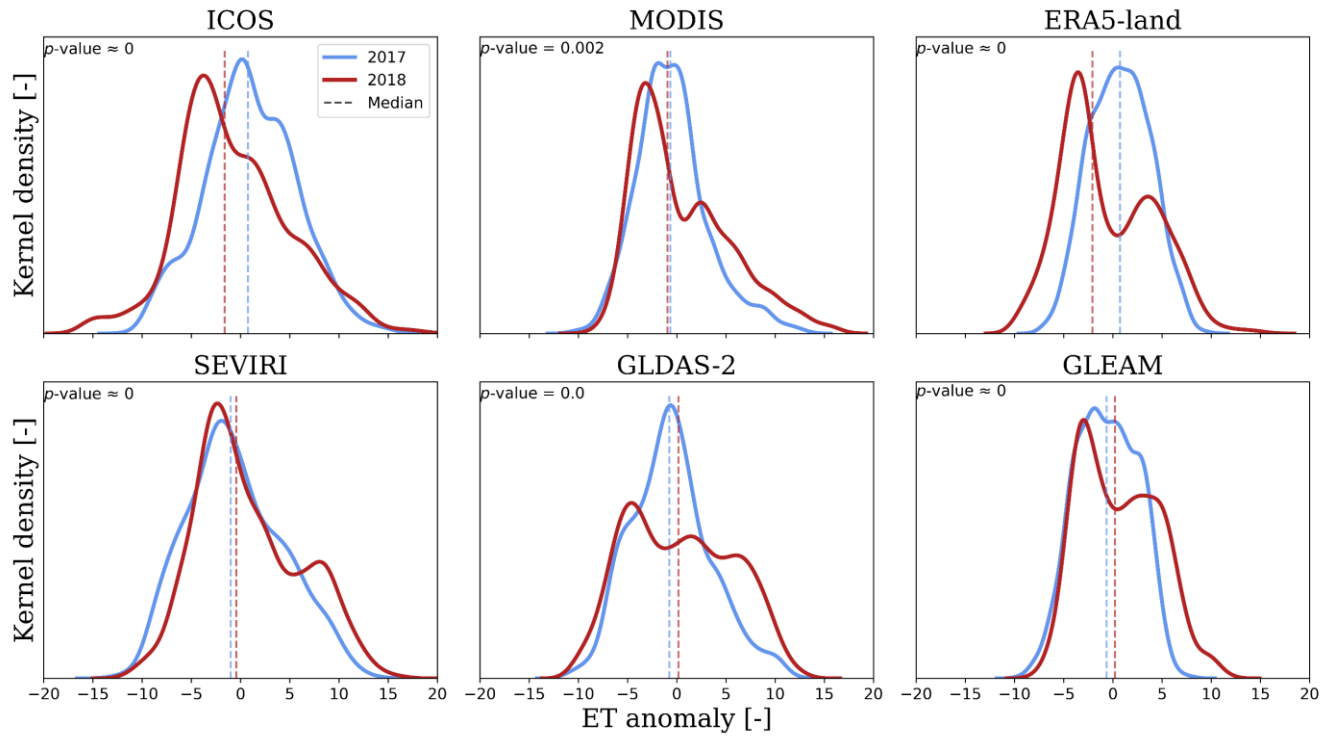

Figure S10. Kernel density estimates of 8-daily ET anomalies (see Sec. 2.3.2) for all investigated ET products during April to October of 2017 and 2018 across all investigated stations. The daily time series were aggregated to 8-daily sums before detrending to account for the temporal resolution of the MODIS ET product. The dashed lines represent the seasonal median of respective parameters and years. The  $p$ -values of a two-sided Wilcoxon rank-sum test indicate the acceptance ( $> 0.05$ ) or rejection ( $< 0.05$ ) of the null hypothesis regarding continuous distributions with equal medians at the 5% significance level.
